# Supplementary material for: Understanding the Imposter Phenomenon through a Gender Equality Lens: A Systematic Literature Review on Women Employees in the Workplace
Source: Research Square preprint supplement (doi:10.21203/rs.3.rs-7874974/v1), 2025-11-07
Supplement: Supplementary file 1 [file f04f30d0554eed08d281f071.docx]

| **No** | **Author(s) & Year** | **Sample & Representativeness** | **Measurement Validity** | **Control Factors** | **Methodological Transparency** | **Risk Level** |
| --- | --- | --- | --- | --- | --- | --- |
| 1 | Clance & Imes (1978) | Moderate (n<200, homogeneous sample) | Strong (theory-based) | Limited | Clear reporting | Moderate |
| 2 | Harvey & Katz (1985) | Moderate | Moderate | Limited | Moderate | Moderate |
| 3 | Kumar & Jagacinski (2006) | Strong (various sectors) | Strong (validated scale) | Comprehensive | Transparent | Low |
| 4 | Clance et al. (1995) | Strong | Strong | Limited | Moderate | Moderate |
| 5 | Bravata et al. (2020) | Strong (meta-level) | Strong | Comprehensive | High reporting | Low |
| 6 | Cokley et al. (2015) | Strong (multiple samples) | Strong | Comprehensive | Transparent | Low |
| 7 | Peteet et al. (2015) | Moderate | Strong | Limited | Transparent | Moderate |
| 8 | Bernard et al. (2018) | Strong | Strong | Limited | Transparent | Low |
| 9 | Rohrmann et al. (2016) | Strong | Strong | Comprehensive | Transparent | Low |
| 10 | Hutchins & Rainbolt (2017) | Strong | Strong | Comprehensive | Transparent | Low |
| 11 | Wang et al. (2018) | Moderate | Strong | Limited | Moderate | Moderate |
| 12 | Villwock et al. (2016) | Moderate | Moderate | Limited | Moderate | Moderate |
| 13 | Parkman (2016) | Strong (qualitative) | Moderate | Limited | Transparent | Moderate |
| 14 | Bündgens-Kosten & Kenning (2020) | Strong | Strong | Moderate | Transparent | Low |
| 15 | Lane (2015) | Moderate | Moderate | Limited | Transparent | Moderate |
| 16 | Clark et al. (2022) | Strong | Strong | Comprehensive | Transparent | Low |
| 17 | Alderton et al. (2024) | Strong | Strong | Comprehensive | Highly transparent | Low |
| 18 | Siraj et al. (2024) | Strong | Strong | Limited | Transparent | Low |
| 19 | Jacob et al. (2024) | Strong | Strong | Limited | Transparent | Low |
| 20 | Gilbert (2024) | Moderate | Strong | Moderate | Moderate | Moderate |
| 21 | Forson et al. (2025) | Moderate | Moderate | Limited | Moderate | Moderate |
| 22 | Rampersad et al. (2025) | Moderate | Strong | Moderate | Transparent | Moderate |
| 23 | Huecker et al. (2022) | Strong | Strong | Moderate | Transparent | Low |
| 24 | Gadsby & Hohwy (2022) | Strong | Strong | Moderate | Transparent | Low |
| 25 | Brauer & Proyer (2022) | Moderate | Strong | Moderate | Moderate | Moderate |
| 26 | Vaughn et al. (2020) | Strong | Strong | Comprehensive | Transparent | Low |
| 27 | Lee et al. (2021) | Strong | Strong | Comprehensive | Transparent | Low |
| 28 | Feigofsky (2022) | Moderate | Moderate | Limited | Moderate | Moderate |
| 29 | Simons (2021) | Strong | Strong | Moderate | Transparent | Low |
